# Supplementary material
Source: MDPI journal article supplement (https://www.mdpi.com/2813-3323/2/1/3)
Supplement: s1 [file s1 › arthropoda-2760380-supplementary.pdf]

## Composition, Distribution, and Biodiversity of Zooplanktons in Tropical Lentic Ecosystems with Different Environmental Conditions

**Table S1.** Zooplankton composition, abundance, and diversity in relation to environmental parameters in tropical and partially tropical countries

| Lake                                                                                | Species composition                                                                                                                          | Dominant species                                                                                                                       | Diversity (Shannon-Wiener Index) | Environmental drivers                                                                                                                                                                                                                                                   | References |
|-------------------------------------------------------------------------------------|----------------------------------------------------------------------------------------------------------------------------------------------|----------------------------------------------------------------------------------------------------------------------------------------|----------------------------------|-------------------------------------------------------------------------------------------------------------------------------------------------------------------------------------------------------------------------------------------------------------------------|------------|
| Sembrong Lake, Malaysia<br>CTSI = 71.11                                             | 32 rotifers and nine microcrustacean species consisting of six species of cladocerans and three species of copepods                          | <i>Brachionus forficula</i> B. <i>calyciflorus</i> , <i>Trichocerca similis</i> , and <i>Ceriodaphnia cornuta</i>                      | $H' = 1.9$                       | High nutrient especially total phosphorus (TP) and total nitrogen (TN), higher chlorophyll <i>a</i> , and lower water transparency associated with higher trophic status contributing to the restructuring community of zooplankton from bigger to smaller size species | [7,8]      |
| Ulansuhai Lake, China                                                               | 50.7 % of rotifers, 32.6 % of copepods, and 16.7 % of cladocerans                                                                            |                                                                                                                                        | $H' = 2.75$                      | Zooplankton community species were influenced by temperature, DO, wind velocity, turbidity, nitrite nitrogen ( $\text{NO}_2\text{-N}$ ), nitrate nitrogen ( $\text{NO}_3\text{-N}$ ) and TN                                                                             | [17]       |
| Eleven (11) urban waterbodies in the Klang Valley, Malaysia<br>CTSI = >58.2 - < 100 | 45 zooplankton species comprising 35 species of rotifer, five species of copepods, three species of cladocerans, and one species of ostracod | <i>Brachionus angularis</i> , <i>Hexarthra mira</i> , <i>Polyarthra vulgaris</i> , and <i>Keratella cochlearis</i>                     | $H' = 1.41 - 2.34$               | Density and diversity were significantly highest in hypereutrophic lakes. Rotifers, dominated by <i>B. angularis</i> , were closely related to TP, and may therefore provide a potential bioindicator of the trophic state in urban tropical lakes                      | [22]       |
| Bukit Merah Reservoir, Malaysia                                                     | 49 zooplankton species including 34 rotifers species, 13 cladocerans species, and 2 copepods species                                         | <i>Keratella cochlearis</i> , <i>Trichocerca</i> sp., <i>Polyarthra</i> sp., <i>Bosminopsis deitersi</i> , and <i>Diaphanosoma</i> sp. | $H' = 1.98 - 2.7$                | Strong association was found between conductivity, dissolved oxygen (DO), and total dissolved solid (TDS) with zooplankton distribution and abundance                                                                                                                   | [40]       |
| Tondano Lake, Indonesia<br>CTSI = 50.8 - 60.8                                       | 112 zooplankton species were found (60 species of rotifers, 31 species of copepods, and 21 species of cladocerans)                           | <i>Brachionus calyciflorus</i> , <i>Trichocerca similis</i> , <i>Keratella valga</i> , <i>K. tropica</i> , and <i>Polyarthra</i> sp.   | $H' = 1.73 - 1.85$               | Temperature, TN, TP, and chlorophyll <i>a</i> are responsible in zooplankton abundance and species number                                                                                                                                                               | [41]       |

|                                         |                                                                                                                                                                                  |                                                                                                                                     |                  |                                                                                                                                                                                                                                                                                                                                                                                            |      |
|-----------------------------------------|----------------------------------------------------------------------------------------------------------------------------------------------------------------------------------|-------------------------------------------------------------------------------------------------------------------------------------|------------------|--------------------------------------------------------------------------------------------------------------------------------------------------------------------------------------------------------------------------------------------------------------------------------------------------------------------------------------------------------------------------------------------|------|
| Baiyangdian Lake, China<br>CTSI = 54.9  | 65 zooplankton species comprising of 68.0 % of rotifers, 16.0 % of cladocerans, and 16.0 % of copepods                                                                           | <i>Polyarthra vulgaris</i> ,<br><i>Trichocerca pusilla</i>                                                                          | H' = 1.07 – 1.89 | Ammonia nitrogen (NH <sub>4</sub> <sup>+</sup> ), TN, TP, and DO were the main environmental factors influencing the species abundance and diversity                                                                                                                                                                                                                                       | [42] |
| Chen Yao Lake, China                    | 49 zooplankton species consisting 28 species of rotifers (57.1 %), 13 species of cladocerans (26.5 %), and eight species of copepods (16.3 %)                                    | <i>Polyarthra trigla</i> ,<br><i>Brachionus budapestiensis</i> ,<br>and <i>Keratella cochlearis</i>                                 | H' = 2.4         | Electrical conductivity (EC), chlorophyll <i>a</i> , TP, and pH were the main environmental factors affecting the zooplankton community structure                                                                                                                                                                                                                                          | [64] |
| Ghrib Reservoir, Algeria                | 61 species of zooplankton consisting of 45 rotifers, 13 cladocerans, and 3 copepods.                                                                                             | <i>Keratella quadrata</i> ,<br><i>Hexarthra fennica</i> ,<br><i>Ceriodaphnia reticulata</i> , and<br><i>Diaphanosoma brachyurum</i> | H' = 1.2 – 3.8   | Water temperature, DO, PO <sub>4</sub> -P, and NO <sub>3</sub> -N are the most significant environmental factors influencing zooplankton community                                                                                                                                                                                                                                         | [67] |
| Saheb Bandh Lake, India                 | 32 zooplankton species consisting of 15 species of rotifers (44.4 %), 10 species of cladocerans (35.3 %), six species of copepods (19.4 %), and one species of ostracods (0.9 %) | <i>Brachionus</i> and <i>Trichocerca</i>                                                                                            | H' = 1.67 – 2.60 | Temperature, pH, DO, and nutrients are the important factors influencing the zooplankton composition. Higher TP and TN is responsible for eutrophication in this lake                                                                                                                                                                                                                      | [68] |
| Vitoria Lake, Kenya                     | Rotifera (10.8%), copepoda (69.8%) and cladocera (19.4%).                                                                                                                        | <i>Brachionus</i> sp.,<br><i>Trichocerca</i> , <i>Ceriodaphnia</i> sp.,                                                             | H' 1.65-2.23     | Negative correlations between abundance of Copepoda with Chlorophyll <i>a</i> (r = -0.5). Rotifera was significantly and negatively correlated with depth (r = -0.7), dissolved oxygen (r = -0.51) but significantly positively correlated with TDS (r = 0.5), salinity (r = 0.5) and conductivity (r = 0.5). Cladocera was significantly and negatively correlated with depth (r = -0.73) | [71] |
| Liuye Lake, China<br>CTSI = 38.5 – 56.0 | 87 rotifer species                                                                                                                                                               | <i>Polyarthra dolichoptera</i> ,<br><i>Synchaeta stylata</i> ,<br><i>Anuraeopsis fissa</i> ,                                        | H' = 2.24        | Temperature, water depth and trophic state were the key factors for spatial-temporal                                                                                                                                                                                                                                                                                                       | [75] |

|                                                          |                                                                                                                                        |                                                                                                                                                                                                                                                                                                                      |                  |                                                                                                                                             |      |
|----------------------------------------------------------|----------------------------------------------------------------------------------------------------------------------------------------|----------------------------------------------------------------------------------------------------------------------------------------------------------------------------------------------------------------------------------------------------------------------------------------------------------------------|------------------|---------------------------------------------------------------------------------------------------------------------------------------------|------|
|                                                          |                                                                                                                                        | <i>Brachionus angularis</i> ,<br><i>Keratella cochlearis</i> , <i>Filinia terminalis</i> ,<br><i>Ascomorpha saltans</i> , <i>A. ovalis</i> , and<br><i>Trichocerca</i> sp.                                                                                                                                           |                  | variation of rotifer community in the urban lake ecosystems                                                                                 |      |
| Hydroelectric reservoirs in Brazil<br>CTSI = 52.2 – 55.3 | 99 zooplankton species consisting 62 species of rotifers, 27 species of cladocerans, and 10 species of copepods                        | <i>Keratella cochlearis</i> ,<br><i>Conochilus unicornis</i> ,<br><i>Polyarthra vulgaris</i> ,<br><i>Bosmina hagmanni</i> ,<br><i>Bosminopsis deitersi</i> ,<br><i>Ceriodaphnia cornuta</i> , <i>C. silvestrii</i> ,<br><i>Diaphanosoma spinulosum</i> , <i>Moina minuta</i> ,<br>and <i>Thermocyclops decipiens</i> | -                | TP and total suspended solid (TSS) concentrations and phytoplankton abundance were most associated with the zooplankton community structure | [86] |
| Teluk Bahang Reservoir, Malaysia                         | 28 zooplankton species including 22 species of rotifers (78.7 %), 4 species of copepods (12.2 %), and 2 species of cladocerans (9.1 %) | <i>Ptygura</i> sp. and<br><i>Bosminopsis deitersi</i>                                                                                                                                                                                                                                                                | -                | The pattern of zooplankton distribution was associated with DO.                                                                             | [88] |
| Eight (8) reservoirs in Brazil                           | Rotifers were the richest group (62 species), followed by Cladocera (27 species) and Copepoda (10 species).                            | <i>Keratella cochlearis</i> ,<br><i>Bosminopsis deitersi</i> ,<br><i>Ceriodaphnia cornuta</i> and<br>juvenile forms (nauplii and copepodites) of copepods3                                                                                                                                                           | -                | High abundance of zooplankton was associated with parameter related to trophic status such as nutrients and chlorophyll a                   | [89] |
| Pantabangan Reservoir, Philippines                       | Rotifera (56.48%), copepoda (35.59%) and cladocera (7.93%).                                                                            | <i>Mesocyclops</i> , <i>Bosmina</i> ,<br><i>Monostyla</i> ,                                                                                                                                                                                                                                                          | H' = 0.24 – 0.33 | Dissolved oxygen, temperature, pH and total dissolved solids associated with zooplankton community structure                                | [89] |
| Thandikulam Reservoir, Sri Lanka                         | Rotifera (14 species), copepoda (5 species) and cladocera (4 species)                                                                  | <i>Brachionus falcatus</i> , <i>B. caudatus</i> ,<br><i>Ceriodaphnia laticaudata</i> , <i>Mesocyclops leukarti</i>                                                                                                                                                                                                   | H' = 1.5 – 2.8   | Dissolved oxygen                                                                                                                            | [90] |

|                          |                                                              |                                                      |                    |                                                                                                                                               |      |
|--------------------------|--------------------------------------------------------------|------------------------------------------------------|--------------------|-----------------------------------------------------------------------------------------------------------------------------------------------|------|
| Dangana Lake,<br>Nigeria | Rotifera (56.39%), copepoda (29.18%) and cladocera (14.42%). | <i>Keratella</i> sp., <i>Brachionus variabilis</i> , | $H' = 2.09 - 2.15$ | Biochemical oxygen demand, Conductivity, pH, nitrate, phosphate and temperature strongly positively correlated with zooplankton distribution. | [91] |
|--------------------------|--------------------------------------------------------------|------------------------------------------------------|--------------------|-----------------------------------------------------------------------------------------------------------------------------------------------|------|
